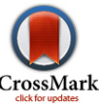

## Correction

# Correction: Functional Characterization Improves Associations between Rare Non-Synonymous Variants in *CHRNA4* and Smoking Behavior

The *PLOS ONE* Staff

The Data Availability statement does not appear on the paper. The correct Data Availability statement is: The authors confirm that all data underlying the findings are freely available without restriction. All data are included within the paper.

The publisher apologizes for this error.

## Reference

1. Haller G, Li P, Esch C, Hsu S, Goate AM, et al. (2014) Functional Characterization Improves Associations between Rare Non-Synonymous Variants in *CHRNA4* and Smoking Behavior. *PLoS ONE* 9(5): e96753. doi:10.1371/journal.pone.0096753

**Citation:** The *PLOS ONE* Staff (2014) Correction: Functional Characterization Improves Associations between Rare Non-Synonymous Variants in *CHRNA4* and Smoking Behavior. *PLoS ONE* 9(6): e99748. doi:10.1371/journal.pone.0099748

**Published:** June 4, 2014

**Copyright:** © 2014 The *PLOS ONE* Staff. This is an open-access article distributed under the terms of the Creative Commons Attribution License, which permits unrestricted use, distribution, and reproduction in any medium, provided the original author and source are credited.
